# Supplementary material
Source: PubMed Central journal article supplement (PMC4174001)
Supplement: supp_M050864_jlr.M050864-1.pdf [file supp_M050864_jlr.M050864-1.pdf]

# Supplementary Figure 1

**A**

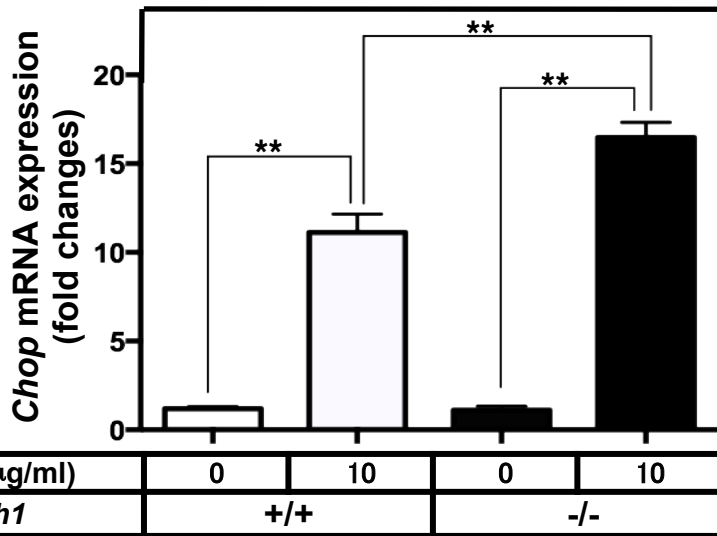

**C**

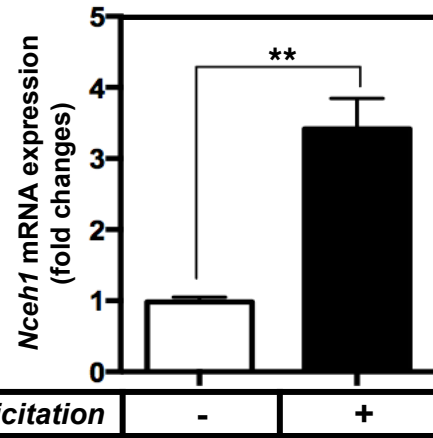

**B**

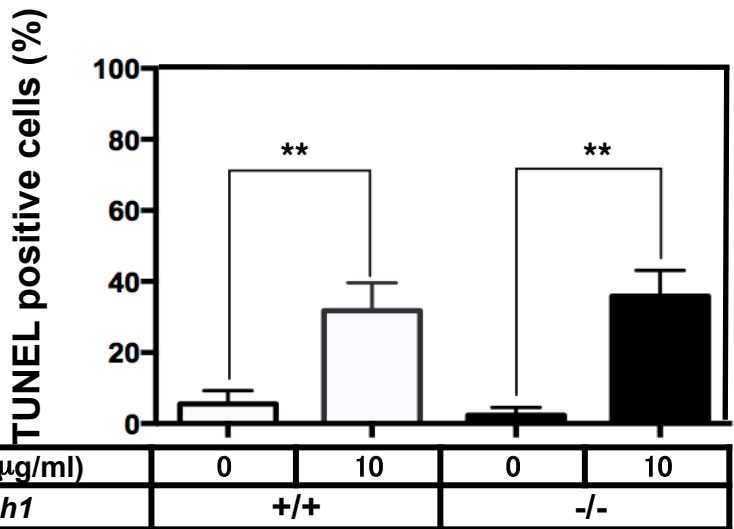

**D**

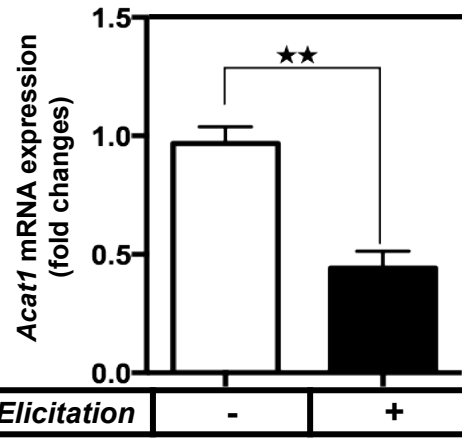

## Supple. Fig. 1. Non-elicited macrophages are susceptible to 25-HC-induced apoptosis and ER stress.

Non-elicited and elicited macrophages were prepared from WT and *Nceh1*<sup>-/-</sup> mice. Five wells of the cells were incubated in DMEM containing 10% LPDS with vehicle or 25-HC (10  $\mu\text{g/ml}$ ) for 12 h. **A**, The apoptotic cells were detected by TUNEL staining. **B**, Expression of *Chop* was measured by RT-PCR. Four wells of non-elicited and elicited Macrophage were incubated in DMEM containing 10% LPDS for 12h. Expression of *Nceh1* (C) and *Acat1* (D) was measured by RT-PCR. Data are expressed as the mean  $\pm$  SEM. \*\* denote  $p < 0.01$ . Respectively, as determined by ANOVA followed by the Tukey-Kramer posthoc test.

## Supplementary Figure II

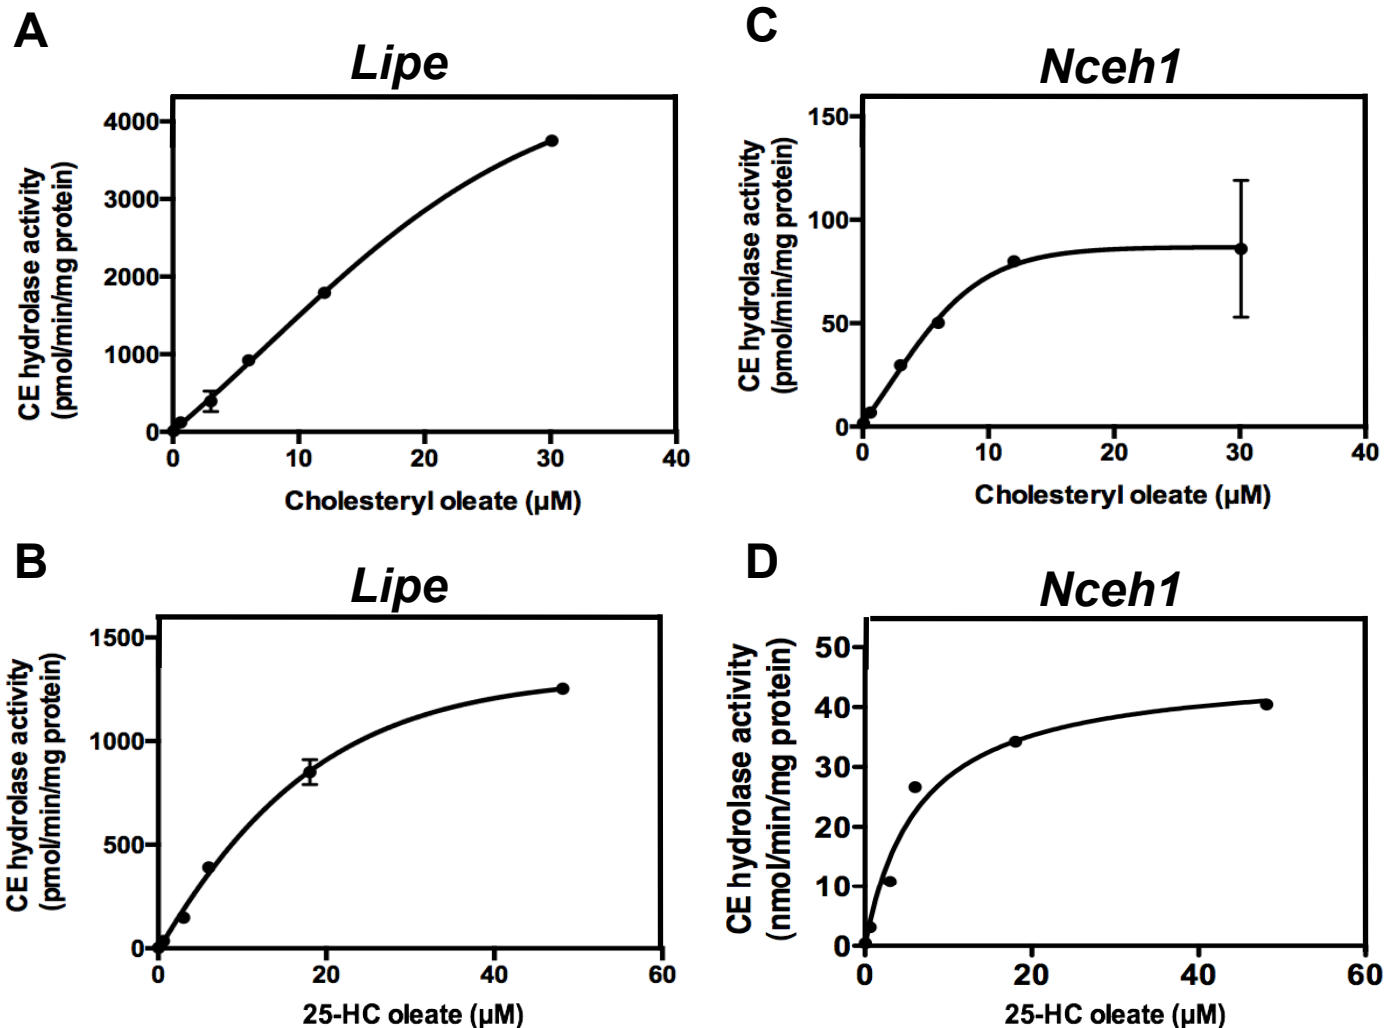

**Supple. Fig. II. Hydrolase activities of Lipe (A, B) and Nceh1 (C, D) for cholesteryl [ $^{14}\text{C}$ ]oleate (A, C) or 25-HC [ $^{14}\text{C}$ ]oleate. (B, D).**

Forty eight h after HEK293A cells were infected with Ad-LacZ, Ad-Lipe or Ad-Nceh1, the cells were sonicated and whole cell lysate were subjected to the measurements of hydrolase activity. Data are expressed as the mean  $\pm$  SEM.

# Supplementary Figure III

**A**

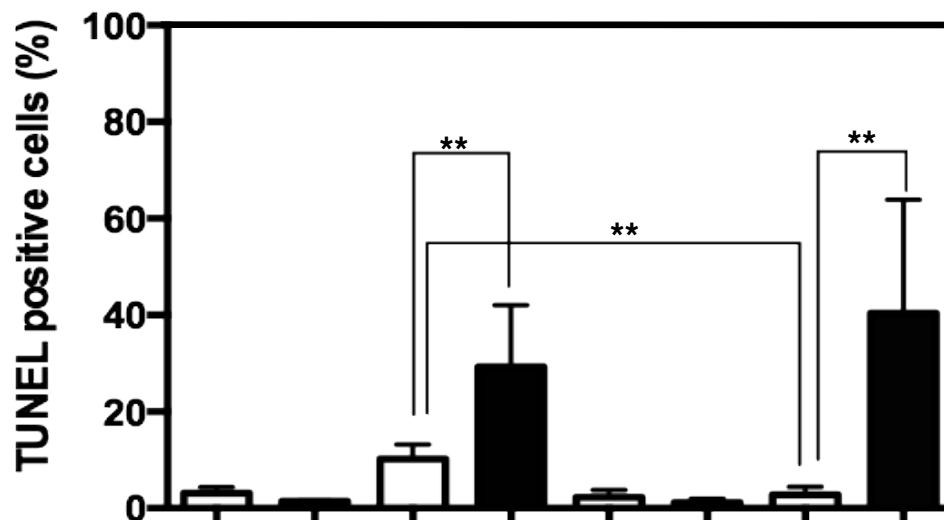

|                  |     |     |     |     |     |     |     |     |
|------------------|-----|-----|-----|-----|-----|-----|-----|-----|
| <i>Nceh1</i>     | +/+ | -/- | +/+ | -/- | +/+ | -/- | +/+ | -/- |
| 25-HC (µg/ml)    | 0   |     | 10  |     | 0   |     | 10  |     |
| Ca <sup>2+</sup> | +   |     |     |     | -   |     |     |     |

**B**

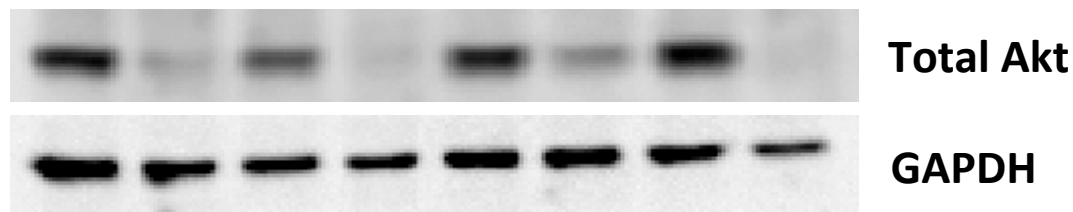

|               |     |    |    |    |     |    |    |    |
|---------------|-----|----|----|----|-----|----|----|----|
| 25-HC (µg/ml) | 0   | 10 | 0  | 10 | 0   | 10 | 0  | 10 |
| MG-132 (µM)   | 0   | 0  | 10 | 10 | 0   | 0  | 10 | 10 |
| <i>Nceh1</i>  | +/+ |    |    |    | -/- |    |    |    |

**Supple Fig. III. Influx of Ca<sup>2+</sup> (A) and facilitation of Akt degradation (B) is not responsible for the Nceh1-dependent augmentation of 25-HC-induced apoptosis.**

**A)** Five wells of TGEMs were incubated in DMEM or Ca<sup>2+</sup> free medium containing 10% LPDS with vehicle or 25-HC (10 µg/ml) for 12 h. The apoptotic cells were detected by TUNEL. Data are expressed as the mean ± SEM. \*\* denote p < 0.01 and determined by ANOVA followed by the Tukey-Kramer posthoc test. **B)** TGEMs were incubated in DMEM containing 10% LPDS with vehicle or 25-HC (10 µg/ml) in the presence or absence of MG-132, a proteasome inhibitor, (10 µM) for 12 h. The cells were homogenized and whole cell lysates were subjected to western blot analysis using anti-Akt antibody. Ten micrograms of proteins of whole cell lysates were separated by SDS-PAGE on the NuPAGE 10% Bis-Tris gel.
